patient performance variables probably played the major role.

Therefore, we conclude that a system such as the One Touch, which eliminates the need for the operator to start and time the test and remove blood, results in an improvement in precision and accuracy, relative to the YSI, of blood glucose monitoring by patients.

# ACKNOWLEDGMENTS

This research was supported by grants from the Kilo Diabetes and Vascular Research Foundation, the San-sum Medical Research Foundation, and Lifescan Inc., a Johnson and Johnson company.

From the Kilo Diabetes and Vascular Research Foundation, St. Louis, Missouri.

Address correspondence and reprint requests to Charles Kilo, MD, Kilo Diabetes and Vascular Research Foundation, 1227 Fernridge Parkway, Suite 100, St. Louis, MO 63141.

# REFERENCES

1. Kilo C, Dudley J: *Self-Monitoring of Blood Glucose for the Person With Diabetes: A Guide for Physicians in Private Practice*. Elkhart, IN, Ames, 1985
2. Peterson CM, (Ed.): *Diabetes Management in the '80's: The Role of Home Blood Glucose Monitoring and New Insulin Delivery Systems*. New York, Praeger, 1982
3. Peterson CM, Jovanovic L: *The Diabetes Self-Care Method*. New York, Simon & Schuster, 1984
4. Dudley J, Kilo C: Self monitoring of glucose update: advanced technologies for glycemic control. *Diabetes Rep* 3:6, 1986
5. Scott A, Tattersall R: Self-monitoring of diabetes: urine testing revisited and self-monitoring of blood glucose updated. In *The Diabetes Annual*/2. Alberti KGMM, Krall LP, Eds. New York, Elsevier, 1987, p. 120-36
6. Consensus statement on self-monitoring of blood glucose. *Diabetes Care* 10:95-99, 1987
7. Hollander M, Wolfe DA: *Nonparametric Statistical Methods*. New York, Wiley, 1973, p. 139-46
8. Sokal RR, Rohlf FJ: *Biometry*. 2nd ed. San Francisco, CA, Freeman, 1981, p. 415-17
9. Draper NR, Smith H: *Applied Regression Analysis*. New York, Wiley, 1966, p. 79

# Recommendation for Strict Control of Plasma Triglyceride in Diabetic Subjects

Gen Yoshino, MD  
Tsutomu Kazumi, MD  
Masahide Iwai, MD  
Kohji Matsuba, MD  
Ippei Iwatani, MD  
Masayuki Matsushita, MD  
Toshio Kasama, MD  
Shigeaki Baba, MD

**A**therosclerosis is the most common complication of diabetes. Hyperlipidemia or dyslipoproteinemia may account for the increased risk of atherosclerosis in diabetic patients (1). However, diabetic patients are still at a higher risk of developing atherosclerosis, even if they are normolipidemic (2,3). There is increasing agreement about the atherogenicity of intermediate-density lipoprotein (IDL) (4). Our previous work demonstrated an increased cholesterol concentration level in the Sf20-60 (IDL<sub>1</sub>) fraction of normolipidemic, non-insulin-dependent diabetic patients (3). This study looked for clinical parameters that correlate with IDL<sub>1</sub> cholesterol concentration. Correlation analyses were performed between the cholesterol in IDL<sub>1</sub> and plasma lipids. Identification of a close relationship between IDL<sub>1</sub> cholesterol and plasma triglyceride enabled us to propose new guidelines for management of mild hypertriglyceridemia in diabetic subjects.

# SUBJECTS AND METHODS

We examined 106 diabetic patients (63 men, 43 women) whose mean  $\pm$  SD ages were  $55 \pm 12$  yr and 41 healthy

volunteers. None of the subjects received drugs that would affect lipid metabolism or had a significant impairment in renal, hepatic, or thyroid function assessed by monitoring serum enzymes. Patients with familial hypercholesterolemia were excluded. The subjects were divided into three groups according to treatment: insulin injection (group I,  $n = 31$ ), sulfonylurea (group S,  $n = 32$ ), or diet alone (group D,  $n = 43$ ). All patients were brought into this study after stabilizing their blood glucose control levels and limiting their plasma cholesterol and triglyceride levels  $<250$  mg/dl. The patients from group S were treated with glyburide, except for 7 treated with gliclazide. Nonobese age-matched healthy and normolipidemic (plasma cholesterol and triglyceride  $<250$  and  $<150$  mg/dl, respectively) subjects served as controls (group C,  $n = 41$ ).

The procedures of blood sampling, lipoprotein separation, cholesterol and triglyceride assay, and statistical analysis were the same as described previously (3).

# RESULTS AND DISCUSSION

Because the data on 82 of 106 patients were presented previously, the patient characteristics from this study were

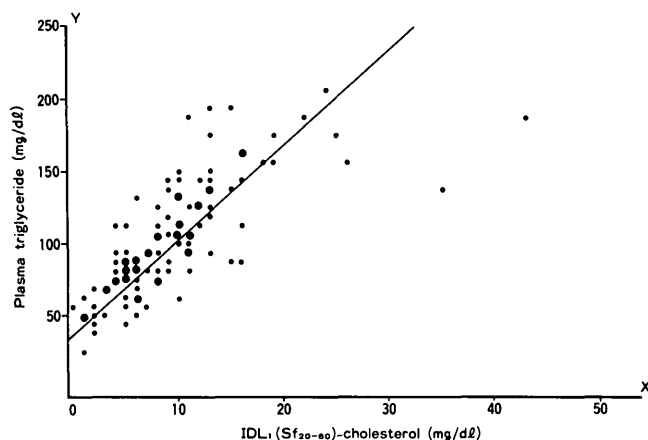

**FIG. 1. Pearson correlation coefficients between intermediate-density lipoprotein (IDL<sub>1</sub>) cholesterol and plasma triglyceride levels of all diabetic subjects. Larger circles indicate multiple patients. When subjects' IDL<sub>1</sub> cholesterol values were within  $5.1 \pm 6.8$  mg/dl (mean  $\pm$  2SD) of normolipidemic (plasma cholesterol and triglyceride  $<250$  and  $<150$  mg/dl, respectively) healthy controls, their plasma triglyceride should be lower than  $\sim 115$  mg/dl.  $y = 6.54x + 36.7$ ;  $r = .71$ ;  $P = .001$ .**

similar to those of the previous report (3). The mean age and body mass index of the diabetic and control groups were comparable. Fasting blood glucose (FBG) and HbA<sub>1c</sub> were significantly elevated in the three diabetic groups compared with control subjects, but there were no significant differences in the two clinical parameters between the three diabetic groups.

Correlation analyses were performed between IDL<sub>1</sub> cholesterol and other lipid parameters in the four groups. IDL<sub>1</sub> cholesterol correlated well with plasma triglyceride in all groups. A significant correlation was also found between IDL<sub>1</sub> and plasma cholesterol or low-density lipoprotein cholesterol in group D.

However, there were no significant correlations between IDL<sub>1</sub> cholesterol and high-density lipoprotein cholesterol, FBG, or HbA<sub>1c</sub> in any group. The regression line between IDL<sub>1</sub> cholesterol and plasma triglyceride levels in the three diabetic groups is shown in Fig. 1.

Recent studies have focused on the atherogenicity of the IDL fraction. Type III hyperlipoproteinemia is often associated with severe atherosclerosis of coronary arteries and has an abnormally high concentration of IDL. Several reports indicate that IDL (Sf12–20 or 20–60) may be one of the risk factors associated with atherosclerosis (5). Our previous study demonstrated an in-

creased cholesterol concentration in the IDL<sub>1</sub> (Sf20–60) fraction of normolipidemic diabetic subjects treated with sulfonylurea or diet alone (3). This implies that diabetic individuals are at a higher risk for atherosclerosis even if they are normolipidemic, and it may be one explanation for the increased risk of cardiovascular disease in diabetic patients.

The significant correlation between IDL<sub>1</sub> cholesterol and plasma triglyceride in diabetic subjects was a unique finding (Fig. 1). The precise atherogenicity of plasma triglyceride is a matter of debate. It is well recognized that high plasma triglyceride levels are an independent risk factor for coronary heart disease only in women. In the Framingham population, high triglyceride levels were a risk factor in diabetic subjects (6).

According to a calculated formula, patients' plasma triglyceride levels should be lower than  $\sim 115$  mg/dl if their IDL<sub>1</sub> cholesterol levels are within  $5.1 \pm 6.8$  mg/dl (mean  $\pm$  2 SD; 3) of normolipidemic healthy control subjects. Therefore, we recommend a new guideline for plasma triglyceride levels in diabetic patients, i.e.,  $<115$  mg/dl, if normotriglyceridemia is defined as  $<150$  mg/dl. Further study is necessary to determine whether suppression of plasma triglyceride by diet and/or drug treatment can lower IDL<sub>1</sub> cholesterol proportionally.

From the Second Department of Internal Medicine, Kobe, University School of Medicine, Chuo-ku, Kobe, and the Division of Endocrinology and Metabolism, Hyogo Medical Center for Adults, Akashi, Japan.

Address correspondence and reprint requests to Gen Yoshino MD, Second Department of Internal Medicine, Kobe University School of Medicine, Chuo-ku, Kobe 650, Japan.

#### REFERENCES

1. Ganda OP: Pathogenesis of macrovascular disease in the human diabetic. *Diabetes* 29:931–42, 1980
2. Nikkilä EA, Hormila P: Serum lipids and lipoproteins in insulin-treated diabetes: demonstration of increased high-density lipoprotein concentrations. *Diabetes* 27:1078–86, 1978
3. Kasama T, Yoshino G, Iwatani I, Iwai M, Hatanaka H, Kazumi T, Oimomi M, Baba S: Increased cholesterol concentration in intermediate density lipoprotein fraction of normolipidemic noninsulin-dependent diabetics. *Atherosclerosis* 63:263–66, 1987
4. Steiner G: Diabetes and atherosclerosis. *Diabetes* 30 (Suppl. 2):1–7, 1981
5. Krauss RM, Lindgren FT, Williams PT, Kelsey SF, Brensike J, Vranizan K, Detre KM, Levy RI: Intermediate-density lipoproteins and progression of coronary artery disease in hypercholesterolaemic man. *Lancet* 2:62–66, 1987
6. Castelli WP: The triglyceride issue: a view from Framingham. *Am Heart J* 112:432–37, 1986
